# Supplementary material for: HIV-1 transcription is regulated by splicing factor SRSF1
Source: PubMed Central journal article supplement — Nucleic Acids Res. 2014 Nov 21;42(22):13812–23. doi: 10.1093/nar/gku1170 (PMC4267630; doi:10.1093/nar/gku1170), 2014-11-21
Supplement: supp_gku1170_nar-01777-a-2014-File009.pdf [file supp_gku1170_nar-01777-a-2014-File009.pdf]

## **HIV-1 transcription is regulated by splicing factor SRSF1**

Sean Paz<sup>1</sup>, Adrian R. Krainer<sup>2</sup> and Massimo Caputi<sup>1</sup>

### **SUPPLEMENTAL MATERIALS AND METHODS**

#### **CD4+ T cells isolation and activation.**

CD4+ cells were isolated by negative selection from leukapheresis-enriched peripheral blood mononuclear cells (PBMC) obtained from unidentified healthy donors (OneBlood, Palm Beach, FL) using the EasySep Human CD4+ T Cell Enrichment Kit (StemCell Technologies) as recommended by the manufacturer. Cells were activated for 48 hours in RPMI, 10% FBS, IL2 20U / mL (Peprotech, Cat# AF-200-02), anti-CD28 antibody (BD bioscience Cat# 340975) at a final concentration of 1ug / mL on 24 well plates coated with anti-CD3 antibody (BioXCell, Cat# BE0001-2). 48 hours after activation total RNA was isolated utilizing the RNAqueous-Micro Total RNA Isolation Kit (LifeTechnologies).

#### **SUPPLEMENTAL REFERENCES**

1. Cartegni, L., Wang, J., Zhu, Z., Zhang, M.Q. and Krainer, A.R. (2003) ESEfinder: A web resource to identify exonic splicing enhancers. *Nucleic acids research*, **31**, 3568-3571.
2. Ledderose, C., Heyn, J., Limbeck, E. and Kreth, S. (2011) Selection of reliable reference genes for quantitative real-time PCR in human T cells and neutrophils. *BMC research notes*, **4**, 427.

#### **SUPPLEMENTAL FIGURE LEGENDS.**

Figure S1. Cell viability assay. Cell viability was measured by quantifying cellular ATP production. Viability of the cells transfected with the SRSF1 expression clones is relative to the pEGFP transfected control and was assayed 6 days after transfection to account for longer term effects of SRSF1 overexpression.

Figure S2. Sequences predicted to function as splicing enhancers when bound by SRSF1 and other SR proteins. The TAR (A) and the 5' hairpin of the 7SK RNA (B) sequences

were analyzed utilizing the ESEfinder 3.0 (1). Consensus binding sequences and matrix score for a number of SR proteins are indicated.

Figure S3. SRSF1 mRNA expression in CD4<sup>+</sup> T cells following activation and HEK293 cells after transfection of the SRSF1 coding plasmid. (A) CD4<sup>+</sup> T cells were isolated from 6 healthy donors. Following activation with anti-CD3/CD28 antibodies and IL2 SRSF1 for 48 hours gene expression was assayed by qPCR utilizing the housekeeping genes RPL13A and IPO8, which expression has been shown to remain constant after activation (2), as normalizing controls. Unstimulated resting CD4<sup>+</sup> T cells were utilized as relative expression controls and assigned the arbitrary value 1. (B) HEK293 cells were transfected with the T7-tagged SRSF1 and a control EGFP-coding plasmids. RNA was extracted and analyzed by qPCR 48 hours after transfection. (C) SRSF1 expression was compared in HEK293 cells and activated CD4<sup>+</sup> T cells utilizing the housekeeping genes GAPDH, RPL13A and IPO8 as normalizing controls. The value of 1 was arbitrarily assigned to the SRSF1 expression level in HEK293 cells.

Table S1. Gene name, original clone name and source (academic and commercial) for the RBP expression clones.

Fig. S1

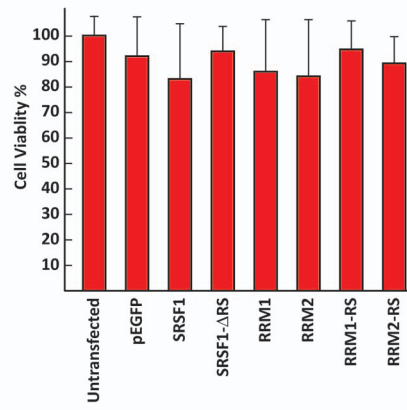

Fig. S2

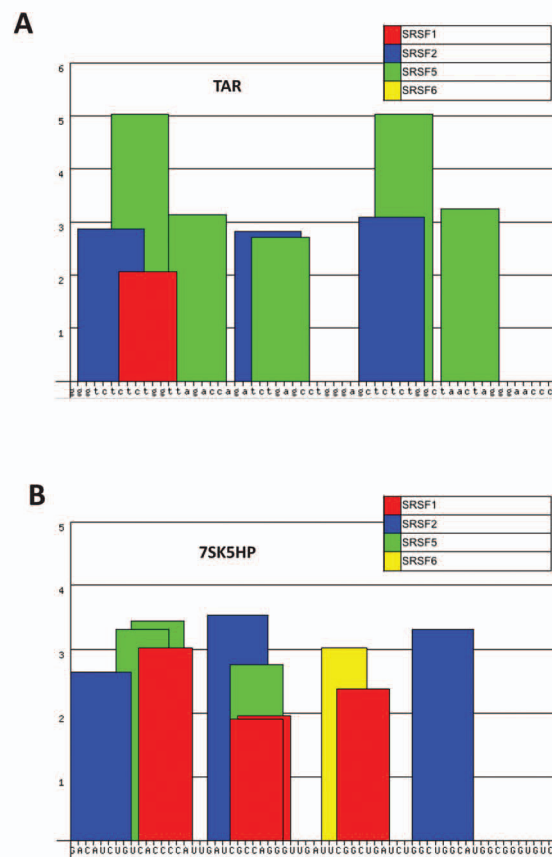

Fig. S3

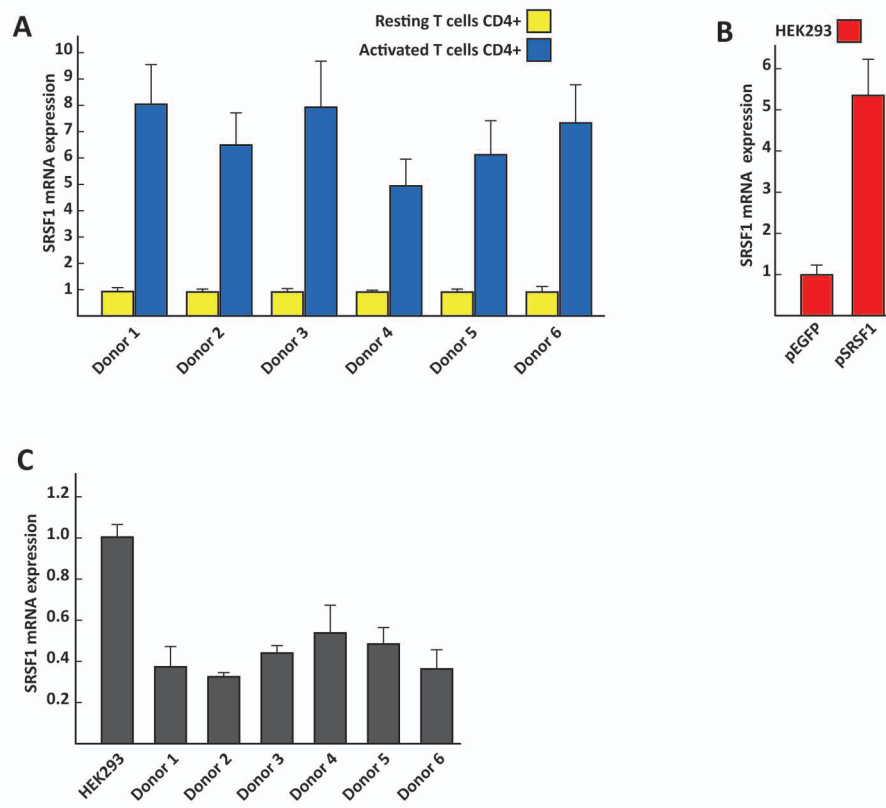

TABLE S1

| GENE      | CONSTRUCT         | SOURCE                                                       |
|-----------|-------------------|--------------------------------------------------------------|
| ACIN      | pcDNA3.1-Acinus S | Dr. Heiner Schaal,<br>Universitätsklinikum Dusseldorf, DE    |
| CELF1     | tgcutgbp          | Dr. Thomas Cooper,<br>Baylor College of Medicine, USA        |
| CELF2     | tgetr3            | Dr. Thomas Cooper,<br>Baylor College of Medicine, USA        |
| CELF3     | 3.1CBP3R          | Dr. Thomas Cooper,<br>Baylor College of Medicine, USA        |
| CELF4     | NCELF4h           | Dr. Thomas Cooper,<br>Baylor College of Medicine, USA        |
| CELF5     | tgCELF5.4         | Dr. Thomas Cooper,<br>Baylor College of Medicine, USA        |
| CELF6     | 3.1CELF6orf1      | Dr. Thomas Cooper,<br>Baylor College of Medicine, USA        |
| EGFP      | pEGFP-N1          | Clontech Laboratories, USA                                   |
| FUS       | TLS 5:hTLS-CHOP   | Dr. David Ron,<br>University of Cambridge, UK                |
| GRSF1     | pCMV6-GRSF1       | Origene Technologies, USA                                    |
| HNRNPA1   | pCG7-A1           | Dr. Adrian R. Krainer<br>Cold Spring Harbor Laboratory, USA  |
| HNRNPA2B1 | pCMV6-HNRNPA2B1   | Origene Technologies, USA                                    |
| HNRNPA3   | pCMV6-HNRNPA3     | Origene Technologies, USA                                    |
| HNRNPC    | pFlag-hnRNP C1/C2 | Dr. Heiner Schaal,<br>Universitätsklinikum Dusseldorf, DE    |
| HNRNPD    | pLJM60-Auf1       | Dr. David Sabatini,<br>Massachusetts Institute of Technology |
| HNRNPF    | pCMV6-HNRNPF      | Origene Technologies, USA                                    |
| HNRNPH1   | pCMV6-HNRNPH1     | Origene Technologies, USA                                    |
| HNRNPH3   | pCMV6-HNRNPH3     | Origene Technologies, USA                                    |
| HNRNPL    | pEFnFlag-hnRNP L  | Dr. Kristen Lynch<br>University of Pennsylvania, USA         |
| HNRNPU    | pCMV6-HNRNPU      | Origene Technologies, USA                                    |
| HTATSF1   | pCMV6-HTATSF1     | Origene Technologies, USA                                    |
| MBNL1     | FLAGMBNL1-4       | Dr. Thomas Cooper,<br>Baylor College of Medicine, USA        |
| MBNL2     | FLAGMBNL2var1     | Dr. Thoma Cooper,<br>Baylor College of Medicine, USA         |
| MBNL3     | FlagMBNL3         | Dr. Thoma Cooper,<br>Baylor College of Medicine, USA         |

|         |                    |                                                             |
|---------|--------------------|-------------------------------------------------------------|
| NONO    | pCMV6-NONO         | Origene Technologies, USA                                   |
| PCBP1   | pENTR-PCBP1        | Dr. Huda Zoghbi,<br>Baylor College of Medicine, USA         |
| PTBP1   | Myc tag WT PTB     | Dr. Douglas Black, UCLA, USA                                |
| RBFOX2  | pFox2-alpha        | Dr. Heiner Schaal,<br>Universitätsklinikum Dusseldorf, DE   |
| RNPS1   | pFlag-RNPS1        | Dr. Heiner Schaal,<br>Universitätsklinikum Dusseldorf, DE   |
| SAP18   | pFlag-Sap18        | Dr. Heiner Schaal,<br>Universitätsklinikum Dusseldorf, DE   |
| SFPQ    | pEFnFlag-PSF       | Dr. Kristen Lynch<br>University of Pennsylvania, USA        |
| SNRNP70 | pFlag-U1-70K       | Dr. Heiner Schaal,<br>Universitätsklinikum Dusseldorf, DE   |
| SNRPA   | pFlag-U1-A         | Dr. Heiner Schaal,<br>Universitätsklinikum Dusseldorf, DE   |
| SNRPC   | pFlag-U1-C         | Dr. Heiner Schaal,<br>Universitätsklinikum Dusseldorf, DE   |
| SNRPD3  | pCMV6-SNRPD3       | Origene Technologies, USA                                   |
| SRSF1   | pCGT7-SF2          | Dr. Adrian R. Krainer<br>Cold Spring Harbor Laboratory, USA |
| SRSF2   | pGCT7-30           | Dr. Adrian R. Krainer<br>Cold Spring Harbor Laboratory, USA |
| SRSF3   | pGCT7-20           | Dr. Adrian R. Krainer<br>Cold Spring Harbor Laboratory, USA |
| SRSF4   | pGCT7-75           | Dr. Adrian R. Krainer<br>Cold Spring Harbor Laboratory, USA |
| SRSF5   | pCMV6-SRSF5        | Origene Technologies, USA                                   |
| SRSF6   | pCMV6-SRSF6        | Origene Technologies, USA                                   |
| SRSF7   | pCMV6-SRSF7        | Origene Technologies, USA                                   |
| TARDBP  | CMV-TDP43          | Dr. Emanuele Buratti, ICGEB, Italy                          |
| TCERG1  | pCMV6-TCERG1       | Origene Technologies, USA                                   |
| TIA1    | eGFP-TIA-1         | Dr. Juan Valcarcel,<br>Centre de Regulació Genòmica, Spain  |
| Tra2A   | pCMV-myc Tra2alpha | Dr. Alan Cochrane,<br>University of Toronto, Canada         |
| Tra2B   | pCMV-myc Tra2beta  | Dr. Alan Cochrane,<br>University of Toronto, Canada         |
| U2AF1   | U2AF65             | Dr. Emanuele Buratti, ICGEB, Italy                          |
